# Supplementary material for: Does Empirically Derived Classification of Individuals with Subjective Cognitive Complaints Predict Dementia?
Source: PubMed Central journal article supplement (PMC6895967; doi:10.3390/brainsci9110314), 2019-11-07
Supplement: brainsci-09-00314-s001.pdf [file brainsci-09-00314-s001.pdf]

**Table S1.** Neuropsychological characteristics (raw scores) of variables used for cluster analysis, means and standard deviations in parentheses) and comparisons of the four empirical groups (Cluster 1, Cluster 2, Cluster 3 and Cluster 4).

| Variables                              | Cluster 1<br><i>n</i> = 47 | Cluster 2<br><i>n</i> = 54 | Cluster 3<br><i>n</i> = 27 | Cluster 4<br><i>n</i> = 64 | Test <sup>a</sup> | Effect Size <sup>b</sup> | Distinct Groups <sup>c</sup> |
|----------------------------------------|----------------------------|----------------------------|----------------------------|----------------------------|-------------------|--------------------------|------------------------------|
| MMSE                                   | 23.44(2.12)                | 26.37(1.94)                | 26.70(2.07)                | 28.68(1.23)                | H=106.58**        | .558                     | 1 < 2, 3 < 4                 |
| CAMCOG-R(Language)                     | 22.19(2.02)                | 23.24(1.62)                | 26.07(1.68)                | 26.89(1.69)                | F=82.40**         | .568                     | 1 < 2 < 3, 4                 |
| CVLT (Long Delay Free Recall)          | 4.38(3.20)                 | 9.91(3.20)                 | 4.37(2.70)                 | 10.17(3.43)                | F=41.61**         | .399                     | 1, 3 < 2, 4                  |
| CANTAB (Pattern Recognition Memory)    | 68.52(10.63)               | 81.01(9.42)                | 62.65(9.49)                | 87.95(6.47)                | H=104.78**        | .549                     | 1, 3 < 2 < 4                 |
| Working Memory (Counting Span)         | 1.25(1.07)                 | 1.92(1.11)                 | 2.25(1.22)                 | 3.07(0.89)                 | H=68.09**         | .356                     | 1 < 2, 3 < 4                 |
| CANTAB(RTI, Five-choice Reaction Time) | 526.23(123.18)             | 411.66(92.30)              | 393.04(67.47)              | 382.16(58.07)              | H=46.91**         | .245                     | 1 > 2, 3, 4                  |

\*\*  $p < 0.01$ ; Note: <sup>a</sup> F Degrees of freedom (3,188) and H (3,  $N = 192$ ); <sup>b</sup>  $\eta^2$ . <sup>c</sup> Post-hoc comparisons, Tukey HSD test (after F) and Mann-Whitney U (after H).
